# Supplementary material for: Molecular Characterization and Expression Profiling of Tomato GRF Transcription Factor Family Genes in Response to Abiotic Stresses and Phytohormones
Source: MDPI journal article supplement (doi:10.3390/ijms18051056), 2017-05-13
Supplement: s1 [file s1]

Khadiza Khatun, Arif Hasan Khan Robin, Jong-In Park, Ujjal Kumar Nath, Chang Kil Kim, Ki-Byung Lim, Ill Sup Nou and Mi-Young Chung

Khadiza Khatun, Arif Hasan Khan Robin, Jong-In Park, Ujjal Kumar Nath, Chang Kil Kim, Ki-Byung Lim, Ill Sup Nou and Mi-Young Chung

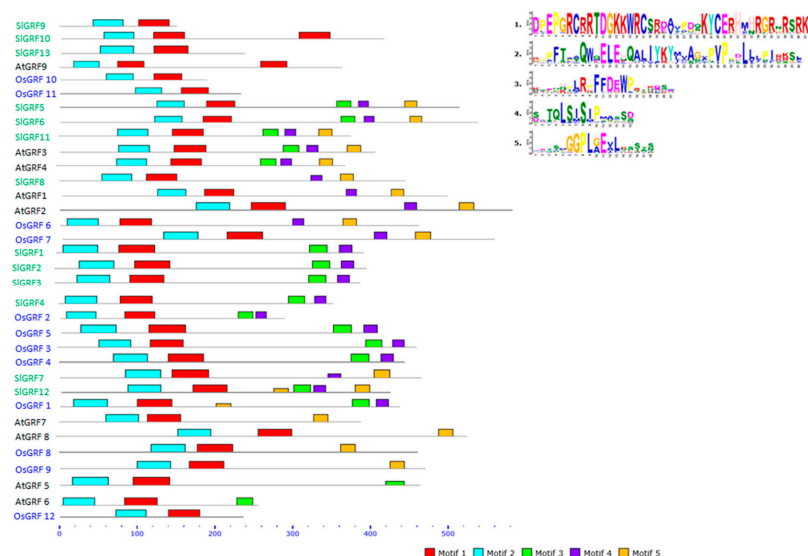

**Figure S1.** Conserved motif distribution in tomato, *Arabidopsis* and rice GRF proteins. The name of each member is shown on the left and different colors represent different motifs. The logos represent the predicted conserved motif sequences on the GRF protein sequences.

**Formatted:** Font: Italic

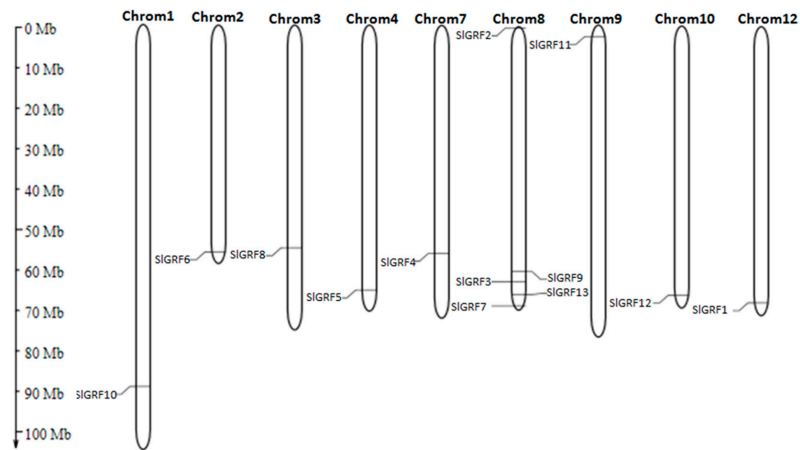

**Figure S2.** Distribution of *SIGRF* genes on tomato chromosomes. The chromosome ([Chrom](#)) number is indicated at the top of each chromosome representation.

**Commented [I1]:** Please provide a higher resolution image. Please note that “SIGRF10” on the left margin is incomplete, please revise.

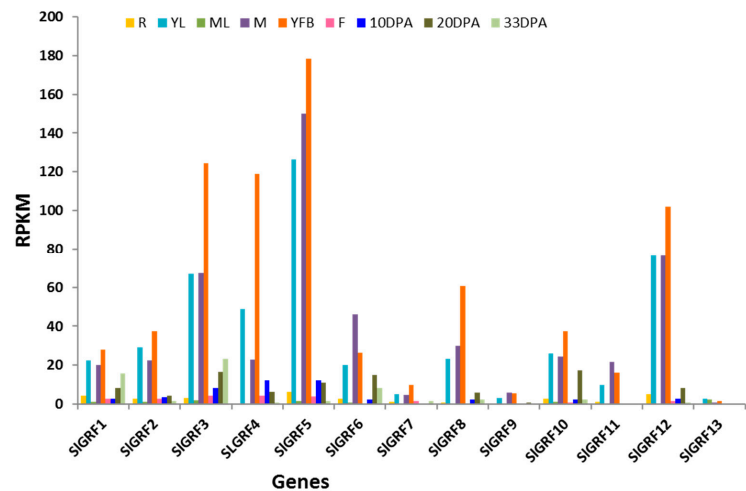

**Figure S3.** Putative expression profile of 13 *SIGRF* genes based on online RNA sequencing data downloaded from Solgenomics database (<https://solgenomics.net/>).

**Commented [TW2]:**

**Table S1.** Primer sequences used for qRT-PCR analysis of *SIGRF* genes.

**Table S2.** Ct values of *EF1a* and [twelve-12](#) *SIGRF* genes at five different concentrations (ng/μl) of cDNA representing the amplification efficiencies of primers used in qRT-PCR. Each data point represents an average of three qPCR observations.

| cDNA concentration           | <i>EF1a</i> | <i>SIGRF1</i> | <i>SIGRF2</i> | <i>SIGRF3</i> | <i>SIGRF4</i> | <i>SIGRF5</i> | <i>SIGRF6</i> | <i>SIGRF7</i> | <i>SIGRF8</i> | <i>SIGRF10</i> | <i>SIGRF11</i> | <i>SIGRF12</i> | <i>SIGRF13</i> |
|------------------------------|-------------|---------------|---------------|---------------|---------------|---------------|---------------|---------------|---------------|----------------|----------------|----------------|----------------|
| 1                            | 16.77       | 25.9          | 24.96         | 25.5          | 26.09         | 25.2          | 27.9          | 25.4          | 25.9          | 25.8           | 27.9           | 26.7           | 27.3           |
| 0.1                          | 20.07       | 29.1          | 28.3          | 29.1          | 31            | 28.5          | 31.3          | 28.7          | 29.5          | 29.1           | 30.9           | 30.5           | 30.9           |
| 0.01                         | 23.37       | 32.4          | 31.2          | 32.4          | 34.3          | 31.8          | 34.6          | 32.1          | 32.8          | 32.4           | 34.7           | 33.8           | 34.9           |
| 0.001                        | 26.67       | 35.9          | 34.5          | 35.7          | 37.6          | 35.1          | 37.9          | 35.4          | 36.1          | 35.7           | 38.5           | 37.1           | 38.2           |
| 0.0001                       | 30.3        | 39.4          | 38.5          | 39.2          | 40.9          | 38.7          | 41.2          | 38.7          | 40.1          | 39.2           | 40.9           | 40.4           | 40.6           |
| Primer efficiency values (%) | 98          | 98            | 100           | 97            | 89            | 99            | 100           | 100           | 93            | 99             | 98             | 97             | 97             |

**Table S3.** Sequence identity among the 13 GRF proteins of tomato.

| Protein     | A   | B   | C   | D   | E   | F   | G   | H   | I   | J   | K   | L   | M   |
|-------------|-----|-----|-----|-----|-----|-----|-----|-----|-----|-----|-----|-----|-----|
| SIGRF1_(A)  | 100 |     |     |     |     |     |     |     |     |     |     |     |     |
| SIGRF2_(B)  | 73  | 100 |     |     |     |     |     |     |     |     |     |     |     |
| SIGRF3_(C)  | 76  | 76  | 100 |     |     |     |     |     |     |     |     |     |     |
| SIGRF4_(D)  | 38  | 39  | 39  | 100 |     |     |     |     |     |     |     |     |     |
| SIGRF5_(E)  | 31  | 35  | 32  | 35  | 100 |     |     |     |     |     |     |     |     |
| SIGRF6_(F)  | 33  | 33  | 50  | 56  | 41  | 100 |     |     |     |     |     |     |     |
| SIGRF7_(G)  | 47  | 47  | 45  | 46  | 48  | 42  | 100 |     |     |     |     |     |     |
| SIGRF8_(H)  | 53  | 58  | 56  | 47  | 43  | 46  | 50  | 100 |     |     |     |     |     |
| SIGRF9_(I)  | 48  | 50  | 50  | 47  | 40  | 42  | 44  | 86  | 100 |     |     |     |     |
| SIGRF10_(J) | 53  | 52  | 55  | 49  | 43  | 37  | 42  | 48  | 46  | 100 |     |     |     |
| SIGRF11_(K) | 52  | 54  | 48  | 58  | 44  | 50  | 44  | 50  | 47  | 53  | 100 |     |     |
| SIGRF12_(L) | 41  | 45  | 49  | 40  | 42  | 52  | 29  | 43  | 37  | 49  | 57  | 100 |     |
| SIGRF13_(M) | 54  | 44  | 43  | 44  | 38  | 48  | 39  | 41  | 42  | 46  | 49  | 45  | 100 |

Please define lettering in table footer

**Commented [I3]:** For missing data or NA data, please fill cells with hyphen (i.e., "-")

**Formatted Table**

**Formatted: Highlight**

**Formatted: MDPI\_4.3\_table\_footer**

**Table S4.** Putative *cis*-elements of more than 5 bp identified in 13 GRF genes from *Solanum lycopersicum* using PlantCARE database (URL).

**Formatted: Font: Bold**

**Formatted: Font: Italic, Not Expanded by / Condensed by**

**Commented [I4]:** Please add URL, for consistency with Figure S3 footer

Table S5. Putative functions and cellular localizations of tomato GRF proteins.

| Gene name     | GO: Molecular function                                                                                                                                                                                                                       | GO: Biological process                       | GO: Cellular component |
|---------------|----------------------------------------------------------------------------------------------------------------------------------------------------------------------------------------------------------------------------------------------|----------------------------------------------|------------------------|
| <i>SIGRF1</i> | ATP binding; adenylyl ribonucleotide binding, purine ribonucleoside binding, purine ribonucleotide binding, ribonucleotide binding, carbohydrate derivative binding, nucleoside phosphate binding, nucleoside binding, ion and anion binding | Regulation of transcription<br>DNA templated | Nucleus                |
| <i>SIGRF2</i> | ATP binding; adenylyl ribonucleotide binding, purine ribonucleoside binding, purine ribonucleotide binding, ribonucleotide binding, phosphate binding, nucleoside binding, ion and anion binding                                             | Regulation of transcription                  | Nucleus                |
| <i>SIGRF3</i> | ATP binding; adenylyl ribonucleotide binding, purine ribonucleoside binding, purine ribonucleotide binding, ribonucleotide binding, carbohydrate derivative binding, nucleoside phosphate binding, nucleoside binding, ion and anion binding | Regulation of transcription                  | Nucleus                |
| <i>SIGRF4</i> | ATP binding; adenylyl ribonucleotide binding, purine ribonucleoside binding, purine ribonucleotide binding, ribonucleotide binding, carbohydrate derivative binding, nucleoside phosphate binding, nucleoside binding, ion and anion binding | Regulation of transcription                  | Nucleus                |
| <i>SIGRF5</i> | ATP binding; adenylyl ribonucleotide binding, purine ribonucleoside binding, purine ribonucleotide binding, ribonucleotide binding, carbohydrate derivative binding, nucleoside phosphate binding, nucleoside binding, ion and anion binding | Regulation of transcription                  | Nucleus                |
| <i>SIGRF6</i> | ATP binding; adenylyl ribonucleotide binding, purine ribonucleoside binding, purine ribonucleotide binding, ribonucleotide binding, carbohydrate derivative binding, nucleoside phosphate binding, nucleoside binding, ion and anion binding | Regulation of transcription                  | Nucleus                |
| <i>SIGRF7</i> | ATP binding; adenylyl ribonucleotide binding, purine ribonucleoside binding, purine ribonucleotide binding, ribonucleotide binding, carbohydrate derivative binding, nucleoside phosphate binding, nucleoside binding, ion and anion binding | Regulation of transcription                  | Nucleus                |
| <i>SIGRF8</i> | ATP binding; adenylyl ribonucleotide binding, purine ribonucleoside binding, purine ribonucleotide binding, ribonucleotide binding,                                                                                                          | Regulation of transcription                  | Nucleus                |

Formatted: Left: 1.9 cm, Right: 2.5 cm, Top: 2.7 cm, Bottom: 2.7 cm, Width: 29.7 cm, Height: 21 cm

Formatted: Font: 9 pt, Bold

Formatted: MDPI\_4.2\_table\_body

Formatted Table

Formatted: Font: 9 pt

Formatted: MDPI\_4.2\_table\_body

|                |                                                                                                                                                                                                                                              |                             |         |
|----------------|----------------------------------------------------------------------------------------------------------------------------------------------------------------------------------------------------------------------------------------------|-----------------------------|---------|
|                | carbohydrate derivative binding, nucleoside phosphate binding, nucleoside binding, ion and anion binding                                                                                                                                     |                             |         |
| <i>SIGRF9</i>  | ATP binding; adenylyl ribonucleotide binding, purine ribonucleoside binding, purine ribonucleotide binding, ribonucleotide binding, carbohydrate derivative binding, nucleoside phosphate binding, nucleoside binding, ion and anion binding | Regulation of transcription | Nucleus |
| <i>SIGRF10</i> | ATP binding; adenylyl ribonucleotide binding, purine ribonucleoside binding, purine ribonucleotide binding, ribonucleotide binding, carbohydrate derivative binding, nucleoside phosphate binding, nucleoside binding, ion and anion binding | Regulation of transcription | Nucleus |
| <i>SIGRF11</i> | ATP binding; adenylyl ribonucleotide binding, purine ribonucleoside binding, purine ribonucleotide binding, ribonucleotide binding, carbohydrate derivative binding, nucleoside phosphate binding, nucleoside binding, ion and anion binding | Regulation of transcription | Nucleus |
| <i>SIGRF12</i> | ATP binding; adenylyl ribonucleotide binding, purine ribonucleoside binding, purine ribonucleotide binding, ribonucleotide binding, carbohydrate derivative binding, nucleoside phosphate binding, nucleoside binding, ion and anion binding | Regulation of transcription | Nucleus |
| <i>SIGRF13</i> | ATP binding; adenylyl ribonucleotide binding, purine ribonucleoside binding, purine ribonucleotide binding, ribonucleotide binding, carbohydrate derivative binding, nucleoside phosphate binding, nucleoside binding, ion and anion binding | Regulation of transcription | Nucleus |

[GO: Define.](#)
